# Supplementary figures and images for: Geometrical and dosimetric evaluation of breast target volume auto-contouring
Source: PubMed Central journal article supplement — Phys Imaging Radiat Oncol. 2019 Nov 30;12:38–43. doi: 10.1016/j.phro.2019.11.003 (PMC7807634; doi:10.1016/j.phro.2019.11.003), 2019-11-30

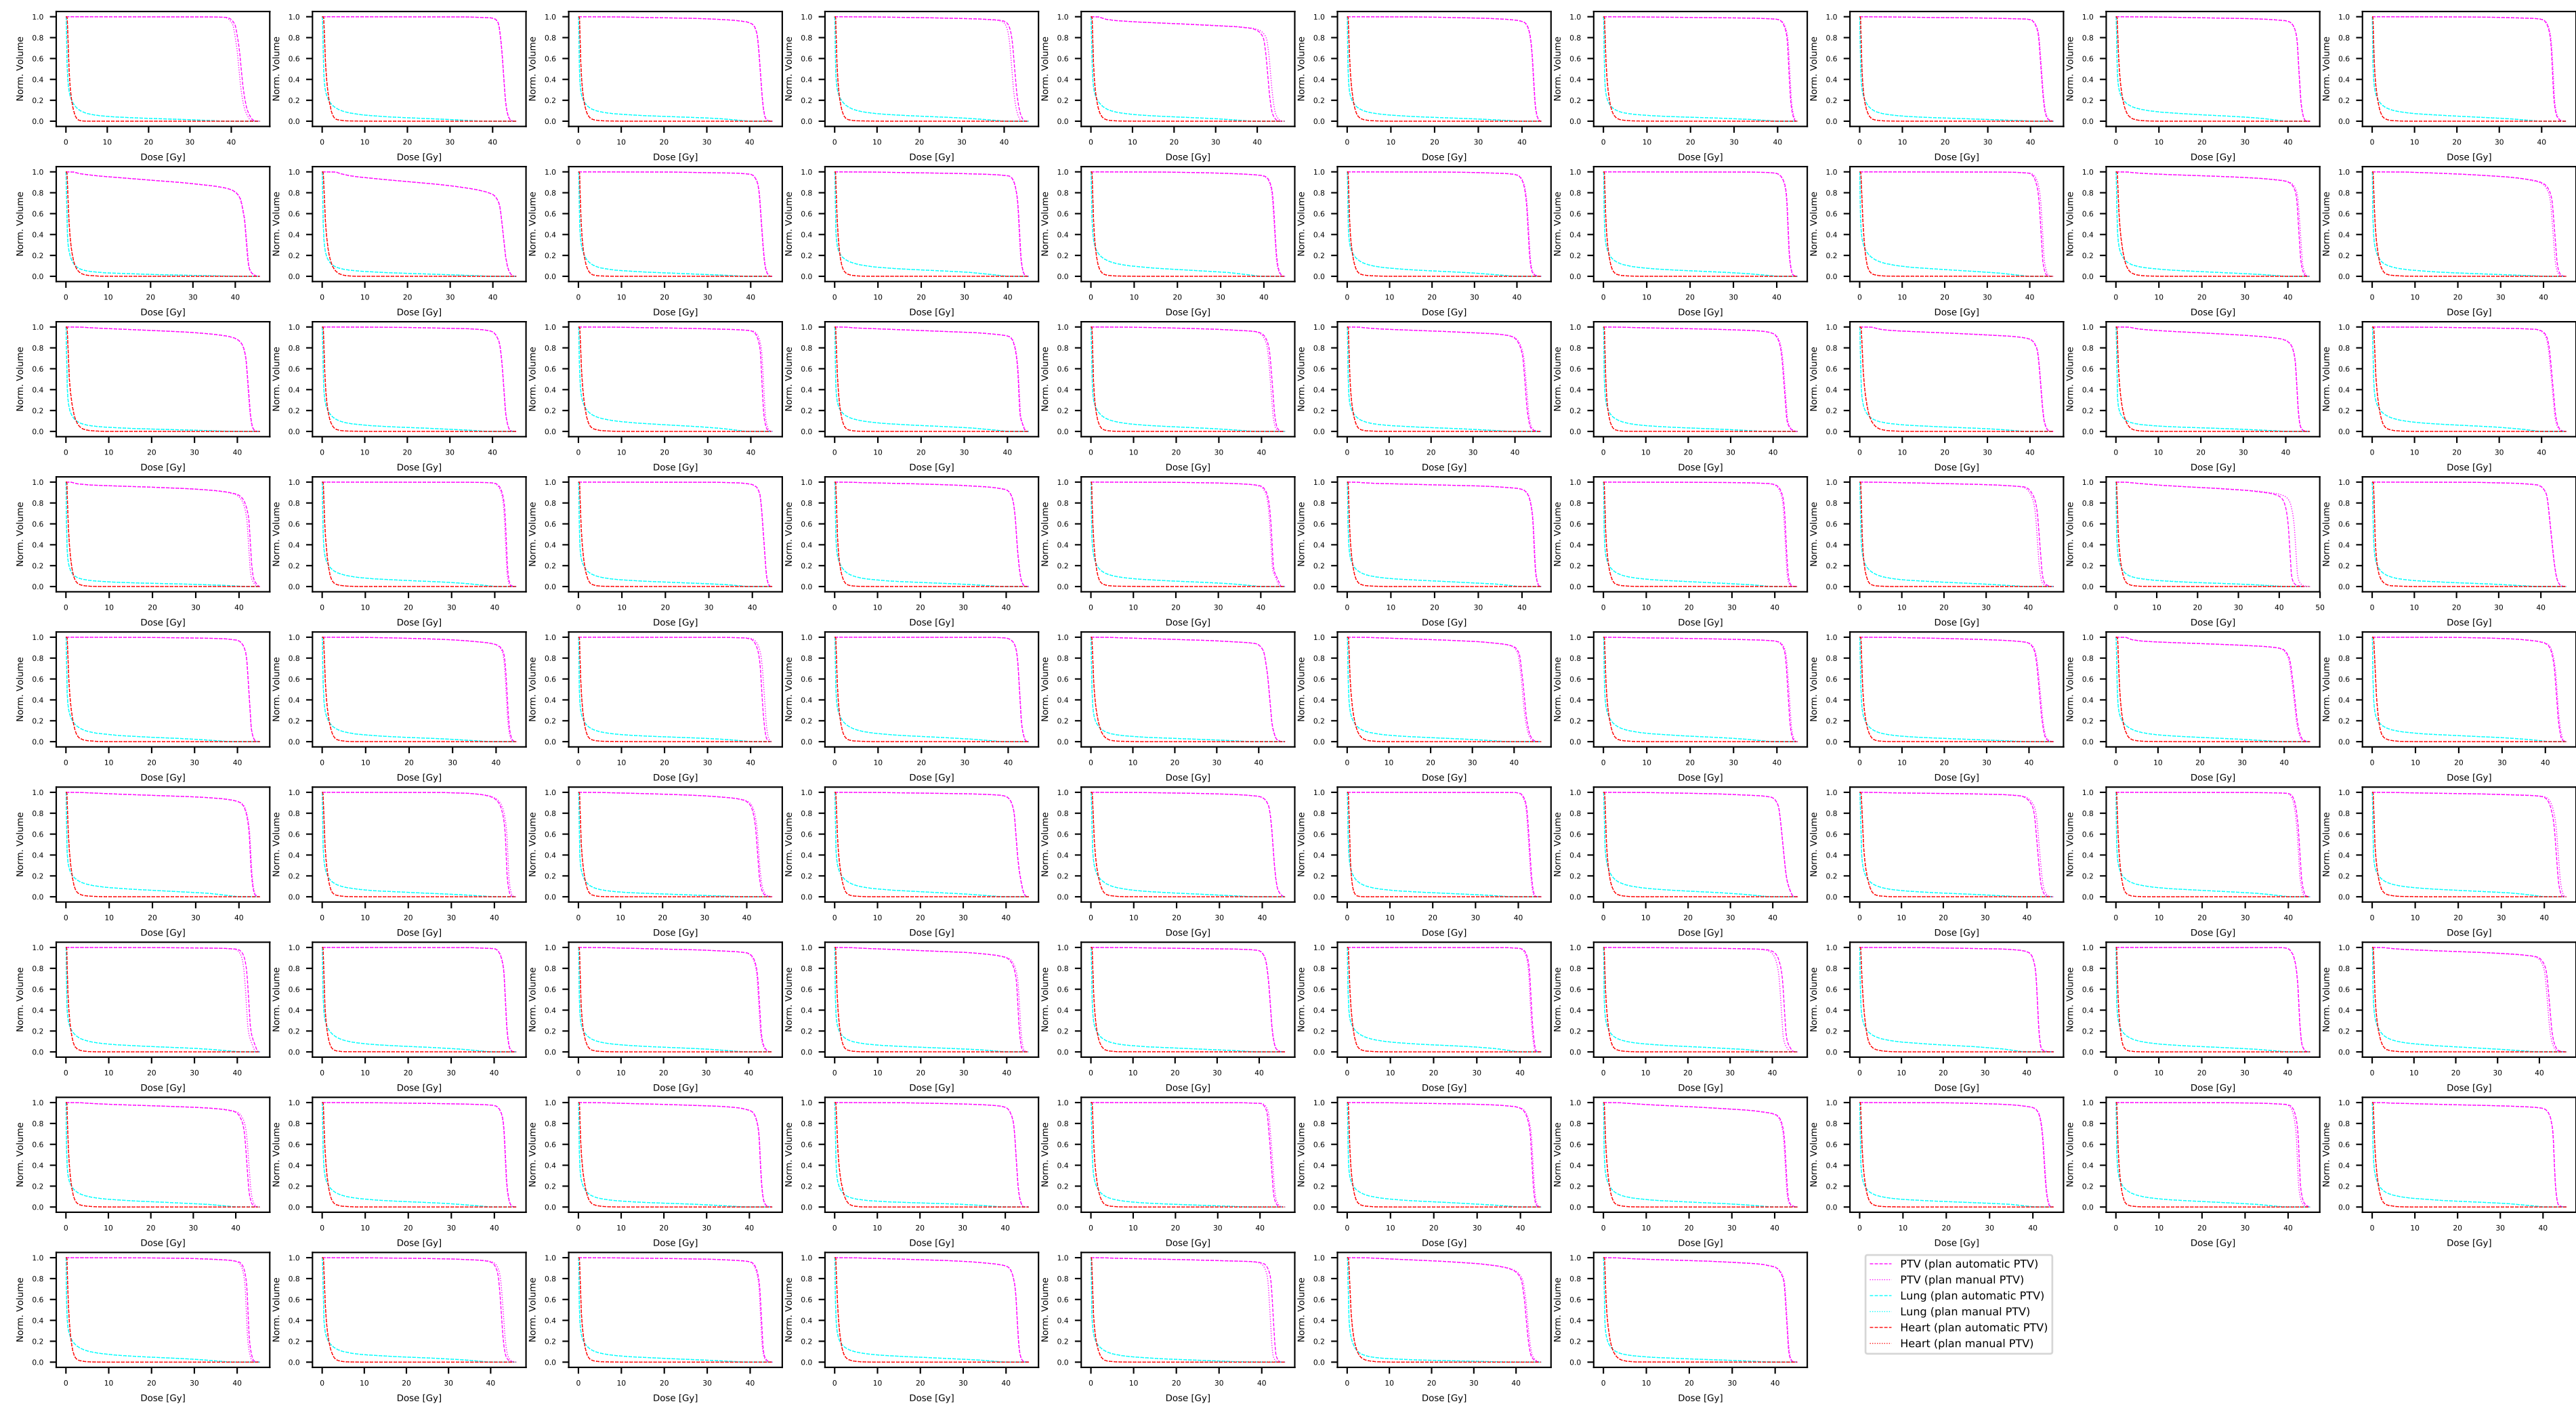

Supplement: mmc1.pdf [file mmc1.pdf]
